# Supplementary material for: Serum levels of immunoglobulin G and complement 3 differentiate non-diabetic renal disease from diabetic nephropathy in patients with type 2 diabetes mellitus
Source: Springer Nature journal article supplement (doi:10.1007/s00592-019-01339-0), 2019-04-19
Supplement: MOESM1 [file 16666290]

**Supplements**


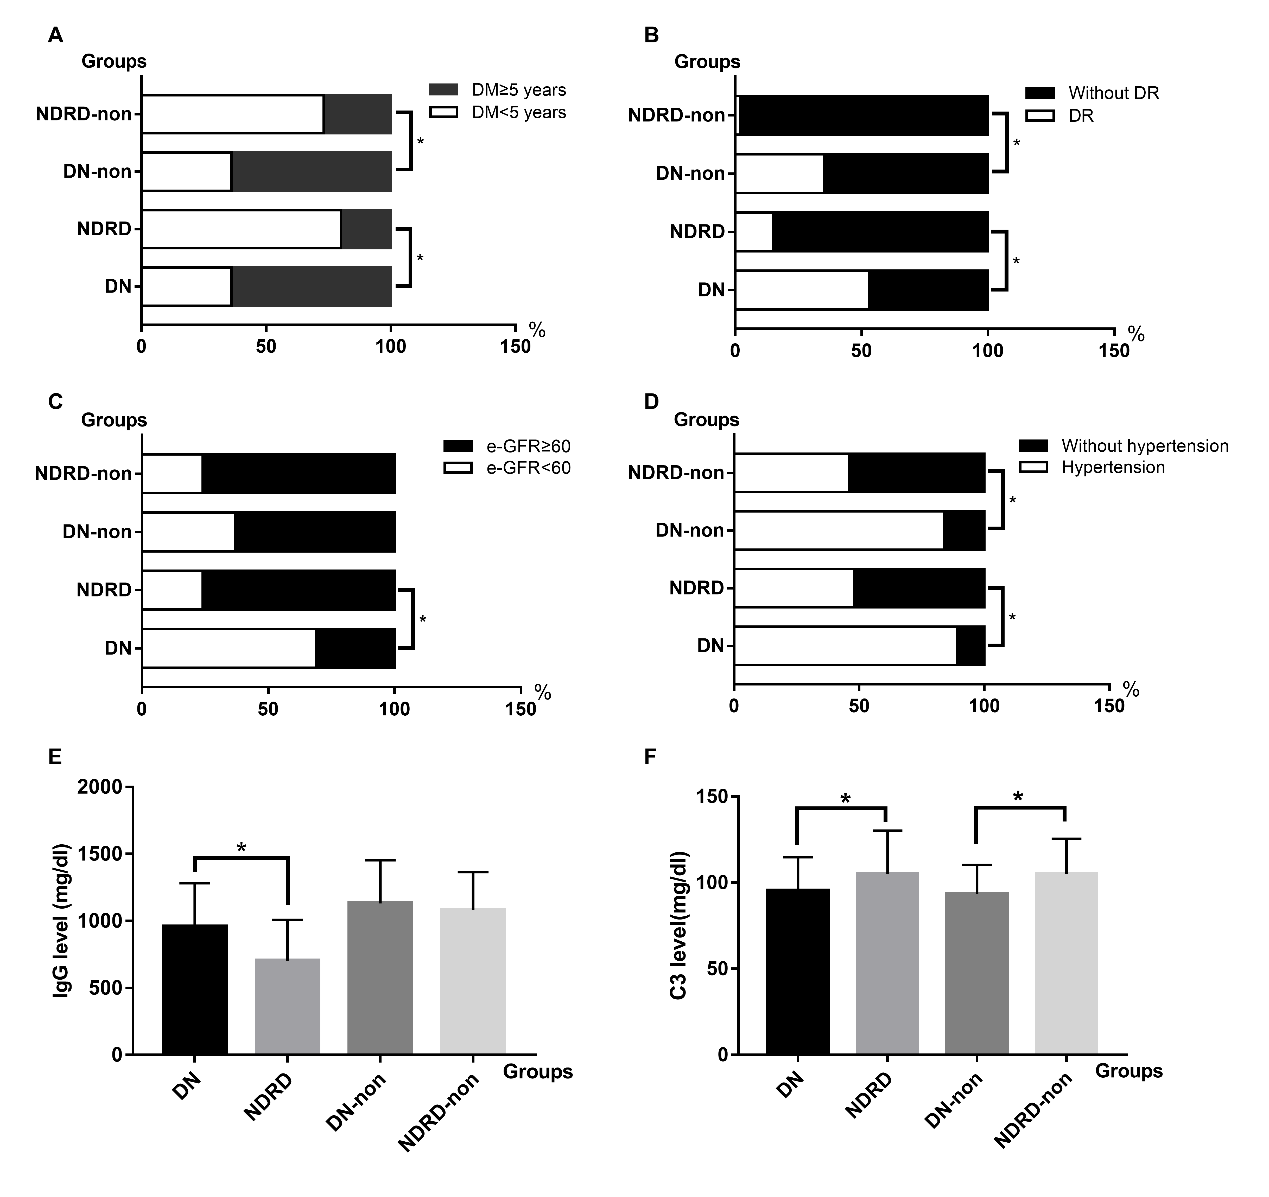


**Sup-Figure 1. General characteristics of different groups in the patients with T2DM. (A)** Distribution of DM history < 5years proportion in four groups. **(B)** Distribution of DR proportion in four groups. **(C)** Distribution of e-GFR < 60 ml/min/1.73m2 proportion in four groups. **(D)** Distribution of hypertension proportion in four groups. **(E)** Distribution of serum IgG level in four groups. **(F)** Distribution of serum C3 level in four groups**.*p<0.05 between two groups.**

**
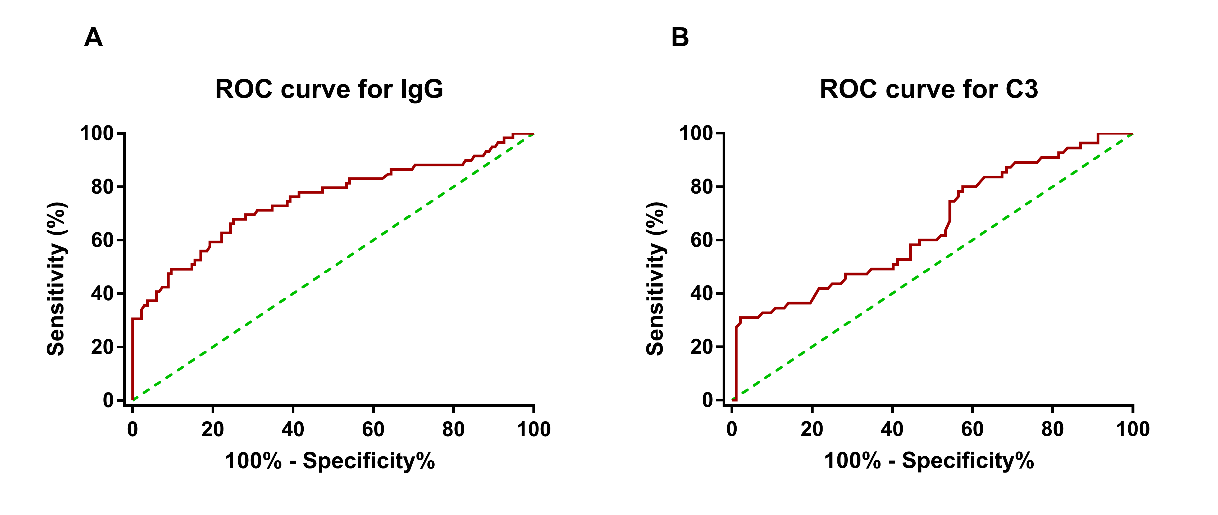
**

**Sup-Figure 2. (A)** Receiver operating characteristic (ROC) curve of IgG for the diagnosis of NDRD in T2DM patients with nephrotic-range proteinuria; **(B)** ROC curve of C3 for the diagnosis of NDRD in T2DM patients non-nephrotic range proteinuria.
